# Supplementary material
Source: PubMed Central journal article supplement (PMC6202187)
Supplement: NIHMS967460-supplement-2.pdf [file NIHMS967460-supplement-2.pdf]

# Supplementary Table 1

| Target Gene | Catalog Number*      | Oligonucleotides                     | Sequences (5'-3')                                |
|-------------|----------------------|--------------------------------------|--------------------------------------------------|
| mouse Duox1 | N/A                  | Primer 1                             | GGGATTCCCAGTCATAAECTCAAGT                        |
|             |                      | Primer 2                             | GCTCTCGACTCCAGTAGCTGTTG                          |
|             |                      | Probe                                | None                                             |
| mouse Duox2 | N/A                  | Primer 1                             | GGTCTTGACAAACGGTTCAC                             |
|             |                      | Primer 2                             | GGTGCAGCTCCACTGTTG                               |
|             |                      | Probe                                | None                                             |
| mouse Nox1  | N/A                  | Primer 1                             | CAAATGTGGGACAATGAGTTTTTC                         |
|             |                      | Primer 2                             | AACCCCCACCCGAGACTT                               |
|             |                      | Probe                                | None                                             |
| mouse Nox2  | N/A                  | Primer 1                             | CCCAACTGGGATAACGAGTTCA                           |
|             |                      | Primer 2                             | AGGGCCACACAGGAAACG                               |
|             |                      | Probe                                | None                                             |
| mouse Nox3  | N/A                  | Primer 1                             | TCTCCGGCTGCACAATGTC                              |
|             |                      | Primer 2                             | CTGCCTGCCATTACAGATAG                             |
|             |                      | Probe                                | None                                             |
| mouse Nox4  | N/A                  | Primer 1                             | GCCTTTATTGTGCGGAGAGACT                           |
|             |                      | Primer 2                             | TGAGATGATGGTGACAGGTTTGT                          |
|             |                      | Probe                                | None                                             |
| mouse OGDHL | N/A                  | Primer 1                             | CAGGCCCGTACACTGTGT                               |
|             |                      | Primer 2                             | AGCCCACTCAAAGCCTAGAAC                            |
|             |                      | Probe                                | None                                             |
| mouse TFAM  | Qiagen-QT00154413    | Mm_Tfam_1_SG QuantiTect Primer Assay | N/A                                              |
| mouse COI   | N/A                  | Primer 1                             | GCCCCAGATATAGCATTCCC                             |
|             |                      | Primer 2                             | GTTTCATCCTGTTCCTGCTCC                            |
|             |                      | Probe                                | None                                             |
| mouse 18S   | N/A                  | Primer 1                             | TAGAGGGACAAGTGGCGTTC                             |
|             |                      | Primer 2                             | CGCTGAGCCAGTCAGTGT                               |
|             |                      | Probe                                | None                                             |
| mouse 18S   | N/A                  | Primer 1                             | CGCGGTTCTATTTTGTGGT                              |
|             |                      | Primer 2                             | AGTCGGCATCGTTTATGGTC                             |
|             |                      | Probe                                | None                                             |
| mouse Act-b | Mm.PT.58.33540333    | PrimeTime Primer 1                   | ATGCCGGAGCCGTTGTC                                |
|             |                      | PrimeTime Primer 2                   | GCGAGCACAGCTTCTTTG                               |
|             |                      | PrimeTime Probe                      | /56-FAM/CCGCCACCA/ZEN/GTTCCGCATG/3IABkFQ/        |
| mouse PPIA  | Mm.PT.39a.2.gs       | PrimeTime Primer 1                   | TTCACCTTCCCAAGACCAC                              |
|             |                      | PrimeTime Primer 2                   | CAAACACAAACGGTTCACAG                             |
|             |                      | PrimeTime Probe                      | /56-FAM/TGCTTGCCA/ZEN/TCCAGCCATTGAG/3IABkFQ/     |
| mouse GAPDH | Mm.PT.39a.1          | PrimeTime Primer 1                   | GTGGAGTCATACTGGAACATGTAG                         |
|             |                      | PrimeTime Primer 2                   | AATGGTGAAGTCCGGTGTG                              |
|             |                      | PrimeTime Probe                      | /56-FAM/TGCAAAATGG/ZEN/CAGCCCTGGT/3IABkFQ/       |
| mouse GPX1  | Mm.PT.58.43296335.gs | PrimeTime Primer 1                   | AGGTCGGACGTAAGTGAAG                              |
|             |                      | PrimeTime Primer 2                   | GACTACACCGAGATGAACGAT                            |
|             |                      | PrimeTime Probe                      | /56-FAM/CCGACACCA /ZEN/GGAGAATGGCAAGAAT/3IABkFQ/ |
| mouse GSR   | Mm.PT.58.13488384    | PrimeTime Primer 1                   | AGCATCTCATCACAGCCAATC                            |
|             |                      | PrimeTime Primer 2                   | TCTACTCGACTGCCTTTACCC                            |
|             |                      | PrimeTime Probe                      | /56-FAM/TGCCAACCA/ZEN/CC11TTCCTTTGTTG/3IABkFQ/   |
| mouse SOD1  | Mm.PT.58.12368303    | PrimeTime Primer 1                   | GTCCTTCCAGCAGTCACAT                              |
|             |                      | PrimeTime Primer 2                   | GGTTCCACGTCATCAGTATG                             |
|             |                      | PrimeTime Probe                      | /56-FAM/TCCAACATG/ZEN/CCTCTTTCATCCGC/3IABkFQ/    |
| mouse SOD2  | Mm.PT.58.14276358    | PrimeTime Primer 1                   | TGCTCCACACGTCACATC                               |
|             |                      | PrimeTime Primer 2                   | CAAGGTGCGTTACAGATTGCT                            |
|             |                      | PrimeTime Probe                      | /56-FAM/ACAACAGGC/ZEN/CTTATTCCCGTCT/3IABkFQ/     |
| mouse CAT   | Mm.PT.58.12825133    | PrimeTime Primer 1                   | ATCTCCTGAGCAAGCCTTC                              |
|             |                      | PrimeTime Primer 2                   | CAAGTTGGTTAATGCAGATGGAG                          |
|             |                      | PrimeTime Probe                      | /56-FAM/ATGCCCTGG/ZEN/TCGGTCTGTAATGG/3IABkFQ/    |
| mouse GLUT1 | Mm.PT.58.7590689     | PrimeTime Primer 1                   | GTGGTGAGTGTGGTGGATG                              |
|             |                      | PrimeTime Primer 2                   | AGTTTCGGCTATAACACTGGTG                           |
|             |                      | PrimeTime Probe                      | /56-FAM/CGTAGCGGT/ZEN/GGTTCCATGTTTGATTG/3IABkFQ/ |
| mouse GLUT3 | Mm.PT.58.30464830    | PrimeTime Primer 1                   | CGTCCTTGAAGATTCCTGTGA                            |
|             |                      | PrimeTime Primer 2                   | GTCACCAACTACGTCACAG                              |
|             |                      | PrimeTime Probe                      | /56-FAM/TCTCCATTG/ZEN/TCCTCCAGCTGTCTCA/3IABkFQ/  |
| mouse Act-b | Mm.PT.58.29001744.g  | PrimeTime Primer 1                   | TCCTTCTGACCCATTCCCA                              |
|             |                      | PrimeTime Primer 2                   | TCCGGCATGTGCAAAGC                                |
|             |                      | PrimeTime Probe                      | N/A                                              |
| mouse PPIA  | Mm.PT.39a.2.gs       | PrimeTime Primer 1                   | TTCACCTTCCCAAGACCAC                              |
|             |                      | PrimeTime Primer 2                   | CAAACACAAACGGTTCACAG                             |
|             |                      | PrimeTime Probe                      | N/A                                              |
| mouse GAPDH | Mm.PT.39a.1          | PrimeTime Primer 1                   | AATGGTGAAGTCCGGTGTG                              |
|             |                      | PrimeTime Primer 2                   | GTGGAGTCATACTGGAACATGTAG                         |

 Integrated DNA Technologies

 Eurofins Operon

 Qiagen
